# Supplementary material for: An amplification-free digital droplet assay for influenza A viral RNA based on CRISPR/Cas13a
Source: Royal Society of Chemistry journal article supplement (doi:10.1039/d4an01328j), 2025-01-01
Supplement: d4an01328j1.pdf [file d4an01328j1.pdf]

## Supporting Information

### **A Cas13a-Microdroplet Platform for Amplification-Free Influenza A virus RNA Diagnostics**

Jiayan Liu<sup>a,b</sup>, Taixue An<sup>c</sup>, Qinjiang Zhu<sup>e</sup>, Jingjie Peng<sup>b</sup>, Heyang Zhao<sup>b</sup>, Zhiyu Liang<sup>a</sup>, Kai Mo<sup>\*e</sup>, Tiancai Liu<sup>\*b,c,d</sup>,  
Kun Wu<sup>\*a</sup>

a. Department of Pathogen Biology, Guangdong Provincial Key Laboratory of Tropical Disease Research, School of Public Health, Southern Medical University, Guangzhou, 510515, China

b. Key Laboratory of Antibody Engineering of Guangdong Higher Education Institutes, School of Laboratory Medicine and Biotechnology, Southern Medical University, Guangzhou 510515, China

c. Department of Laboratory Medicine, Nanfang Hospital, Southern Medical University, Guangzhou 510515, China

d. Provincial Key Laboratory of Immune Regulation and Immunotherapy, Southern Medical University, Guangzhou 510515, China

e. Department of Anesthesiology, Zhujiang Hospital, Southern Medical University, Middle Gongye Avenue No. 253, Guangzhou, China

\*Corresponding Author E-mail: mokai303@163.com (Kai Mo), liutc@smu.edu.cn (Tiancai Liu), wksmu@163.com (Kun Wu).

#### **CONTENTS**

|                                                                                                 |    |
|-------------------------------------------------------------------------------------------------|----|
| 1. Table S1: RNA and DNA sequences used in this study-----                                      | S2 |
| 2. Figure S1: Alignment of the M2 gene sequences of different subtype of influenza A virus----- | S3 |
| 3. Figure S2: The validation of polystyrene microspheres captured targets -----                 | S4 |
| 4. Figure S3: The mosaic fluorescence image of the whole chip -----                             | S5 |
| 5. Figure S4: Image analysis and data extraction process of fluorescence image -----            | S6 |
| 6. Figure S5: Quantification range of RT-qPCR-----                                              | S7 |
| 7. Figure S6: The specificity of this assay-----                                                | S8 |

**Table S1. DNA and RNA sequences used in this study.**

| Name                                                  | Sequence (5'-3')                                                                                                                                                                                                                          |
|-------------------------------------------------------|-------------------------------------------------------------------------------------------------------------------------------------------------------------------------------------------------------------------------------------------|
| <b>Influenza A virus<br/>Target RNA</b>               | UCUUUCUAUCAUCCCGUCAGGCCCCCUCAAAGCCGAGAU CGCGCAGAGACUGGAAAGUGU<br>CUUUGCAGGAAAGAACACAGAU CUUGAGGCUCUCAUGGAAUGGCUAAAGACAAGACCAA<br>UCUUGUCACCUCUGACUAAGGGAAUUUUAGGAUUUGUGUUCACGCUCACCGUGCCCAGU<br>GAGCGAGGACUGCAGCGUAGACGCUUUGUCCAAAAUGCCCU |
| <b>crRNA</b>                                          | UAAUACGACUCACUAUAGGGGAUUUAGACUACCCCCAAAAACGAAGGGGACUAAAAGCCAU<br>UCCAUGAGAGCCUCAAGA                                                                                                                                                       |
| <b>crRNA<br/>IVT Template</b>                         | TCTTGAGGCTCTCATGGAATGGCTTTTAGTCCCCTTCGTTTTTGGGGTAGTCTAAATCCCCTATA<br>GTGAGTCGTATTA                                                                                                                                                        |
| <b>RNA Reporter</b>                                   | FAM-UUUUU-BHQ1                                                                                                                                                                                                                            |
| <b>Capture Probe</b>                                  | NH2 C12-TTCCCATTTAGGGCATT                                                                                                                                                                                                                 |
| <b>T7 Promoter</b>                                    | GAAATTAATACGACTCACTATAGGG                                                                                                                                                                                                                 |
| <b>Influenza A virus -<br/>PCR-Forward<br/>primer</b> | TAATACGACTCACTATAGGGTCTTTCTATCATCCCGTCA                                                                                                                                                                                                   |
| <b>Influenza A virus -<br/>PCR-Forward<br/>primer</b> | TTCCCATTTAGGGCATT                                                                                                                                                                                                                         |

| ACCESSION | Subtype | Gene | Position of forward |                     | Position of reverse primer |                     |
|-----------|---------|------|---------------------|---------------------|----------------------------|---------------------|
|           |         |      | 64                  | 84                  | 266                        | 283                 |
| NC_007367 | H3N2    | M2   | ACGT                | TCTCTCTATCGTTCCATCA | GGC.....TCC                | AAAATGCCCTAAATGGGAA |
| NC_004907 | H9N2    | M2   | ATGT                | TCTCTCTATCATCCCATCA | GGC.....TCCA               | AAAATGCCCTAAATGGGAA |
| NC_026427 | H7N9    | M2   | ACGT                | TCTCTCTATCATCCCATCA | GGC.....TCCA               | AAAACGCCCTAAATGGGAA |
| NC_026431 | H1N1    | M2   | ACGT                | TCTTCTATCATCCCGTCA  | GGC.....TCCA               | AAAATGCCCTAAATGGGAA |
| NC_002016 | H1N1    | M2   | ACGT                | TCTTCTATCATCCCGTCA  | GGC.....TCCA               | AAAATGCCCTAAATGGGAA |
| NC_007363 | H5N1    | M2   | ACGT                | TCTCTCTATCGTCCCGTCA | GGC.....TCCA               | GAATGCCTAAATGGAAA   |
| NC_007377 | H2N2    | M2   | ACGT                | TCTCTCTATCGTCCCGTCA | GGC.....TCCA               | AAAATGCCCTAAATGGGAA |

Figure S1. Alignment of the M2 gene sequences of different subtype of influenza A virus, the gene sequence of strains obtained from National Center for Biotechnology Information is shown in the figure. Highlighted are the primer sequences.

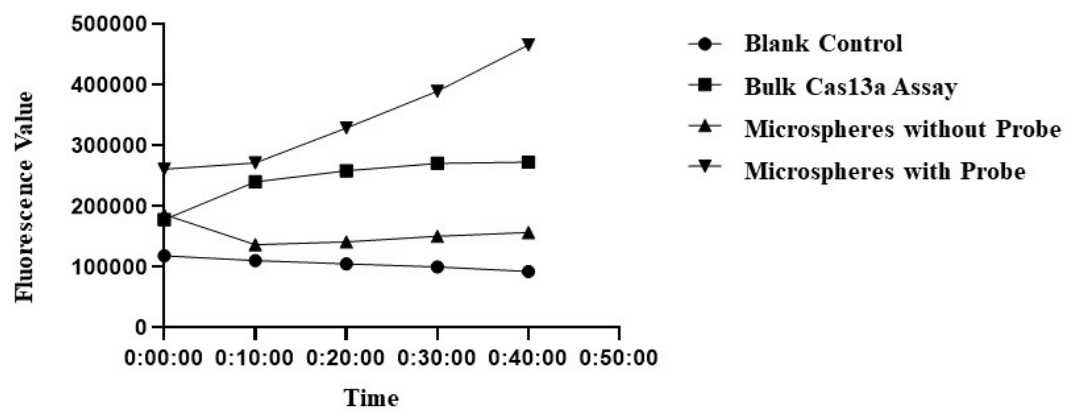

Figure S2. The fluorescence of bulk cas13a assay using the microsphere captured with target RNA.

A

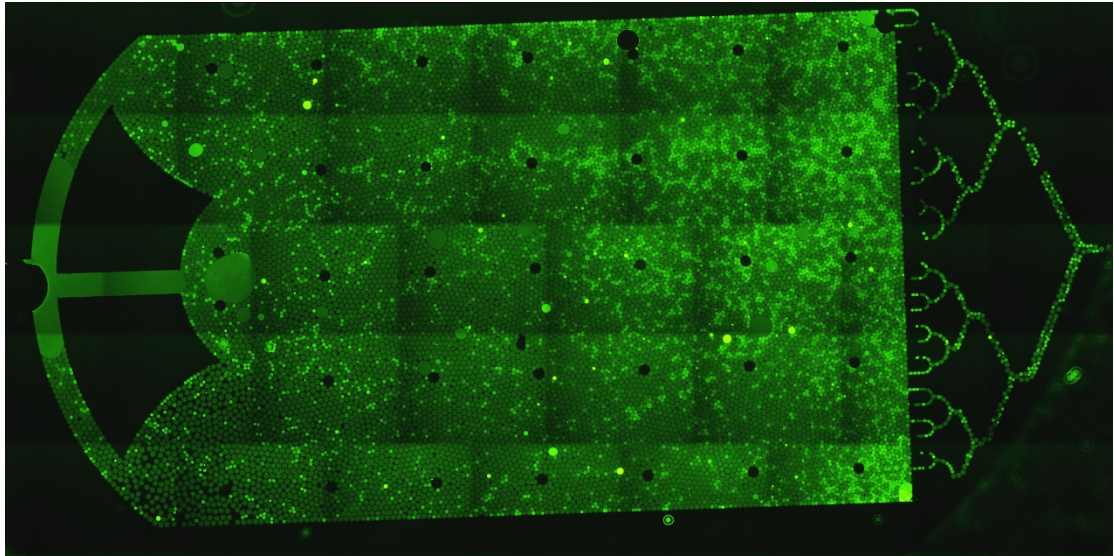

B

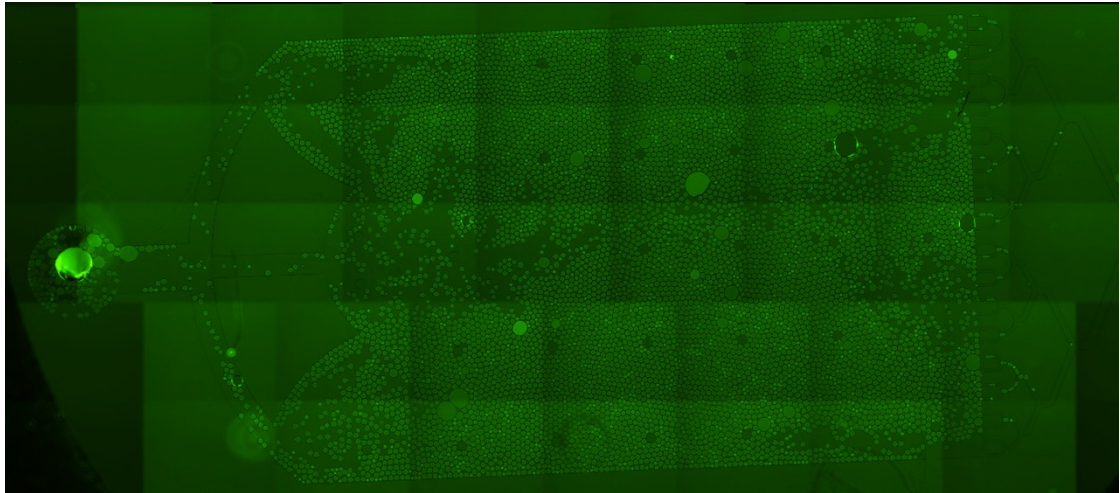

Figure S3. The mosaic fluorescence image of the whole chip with different concentrations of the target RNA. A. The representative fluorescence image for analysis. ( $10^4$  copies/ $20\mu\text{L}$ ) B. The representative fluorescence image for analysis. (Blank Control)

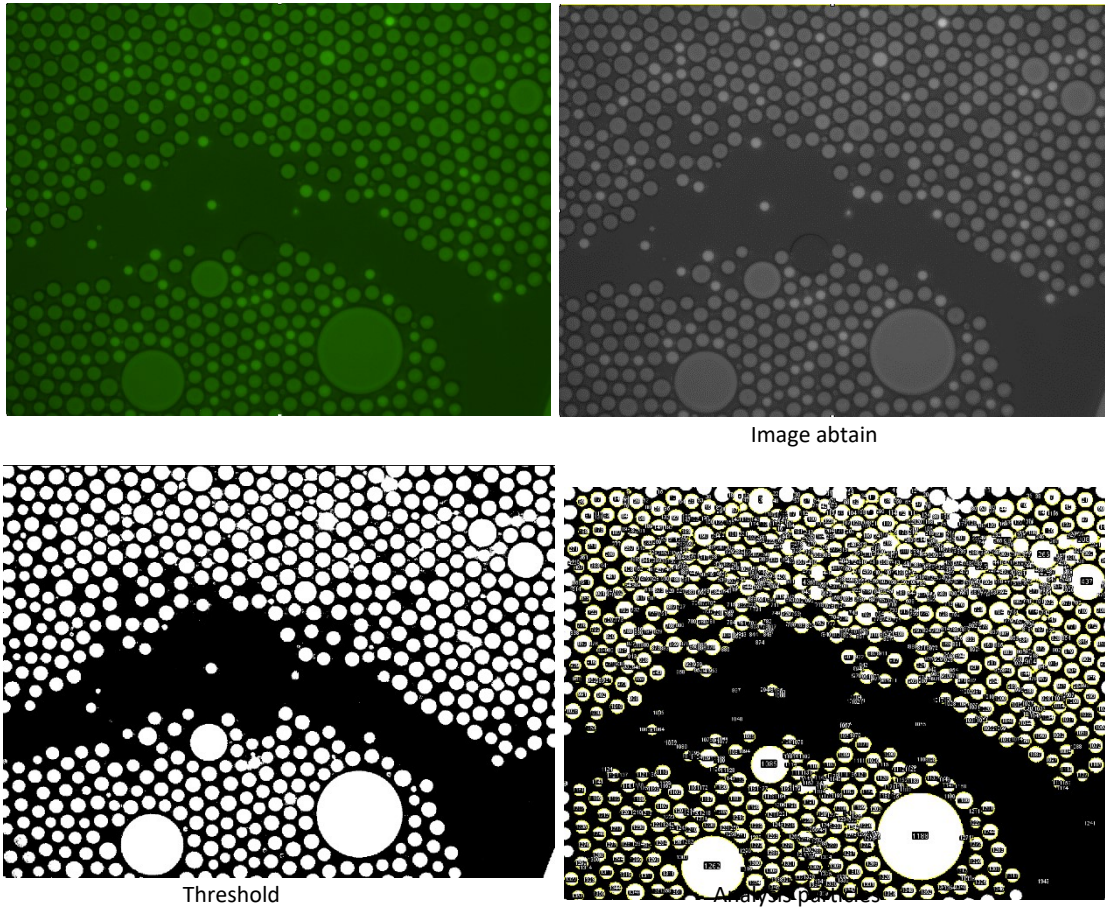

Figure S4. Image analysis and data extraction process of fluorescence image.

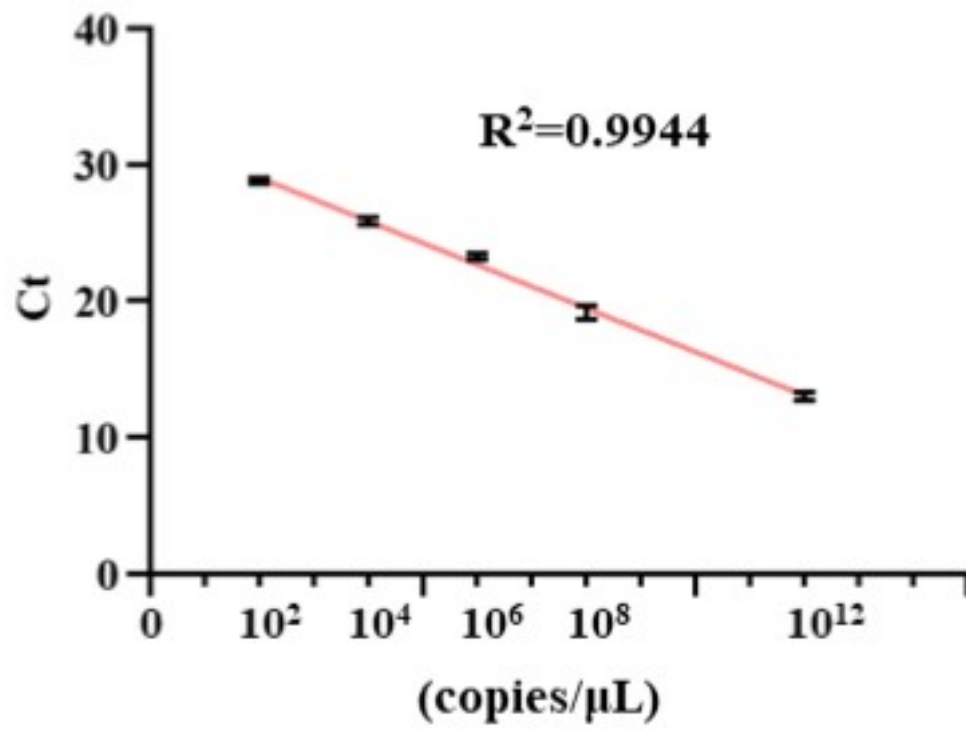

Figure S5: Quantification range of RT-qPCR



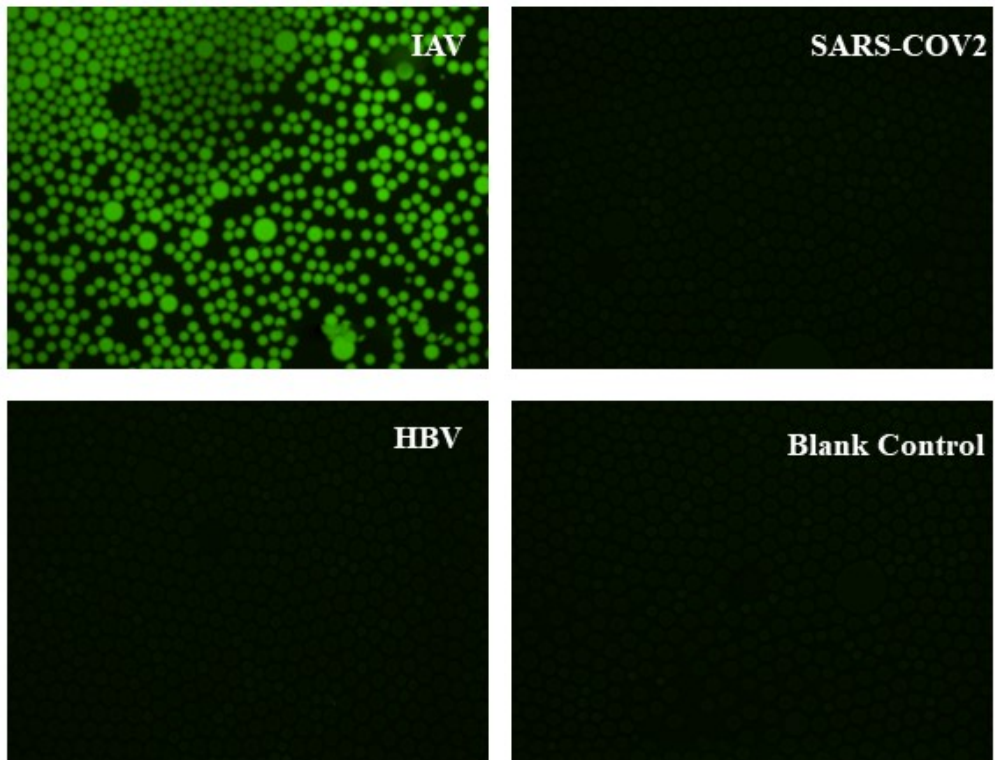

Figure S6. The specificity of this assay.
